# Supplementary material
Source: HighWire-hosted journal article supplement (https://bmjopen.bmj.com/content/9/1/e023161)
Supplement: inline-supplementary-material-2 [file inline-supplementary-material-2.pdf]

**Supplemental file 2:** Validations studies describing performance of Injury severity measures to predict mortality

| Injury severity measure | Country     | Year | Number of hospital | Specific injury mechanism                    | Study population                                                                                         | Age included          | Sample size | % mortality | Missing data % | Performance |               | Calibration |         |
|-------------------------|-------------|------|--------------------|----------------------------------------------|----------------------------------------------------------------------------------------------------------|-----------------------|-------------|-------------|----------------|-------------|---------------|-------------|---------|
|                         |             |      |                    |                                              |                                                                                                          |                       |             |             |                | AUROC       | 95% CI        | H-L         | p-value |
| APACHE II               | Turkey[1]   | 2011 | 1                  | All injuries                                 | Injury patients admitted to ICU in a tertiary referral hospital                                          | >=15                  | 100         | 14%         | NR*            | 0.92        | NA‡           | NA          | NA      |
|                         | Thailand[2] | 2012 | 1                  | All injuries                                 | Injury patients admitted to surgical ICU, neurosurgical ICU or burn unit in a tertiary referral hospital | Adult (not specified) | 132         | 20%         | NR             | 0.89        | NA            | NA          | NA      |
|                         | Iran[3]     | 2012 | 1                  | Head injuries                                | Head injury associated with systemic trauma admitted to neurosurgical ICU                                | >=14                  | 93          | 19.5%       | NR             | 0.892       | NA            | NA          | NA      |
|                         | Morocco[4]  | 2014 | 1                  | Moderate and severe traumatic brain injuries | Injury patients admitted to medical and surgical ICU due to TBI                                          | >=16                  | 225         | 40.0%       | 7.6%           | 0.92        | (0.837-0.982) | NA          | NA      |

|            |           |      |   |                                              |                                                                                                        |      |      |       |                        |                                                |                                                     |                                       |                                       |
|------------|-----------|------|---|----------------------------------------------|--------------------------------------------------------------------------------------------------------|------|------|-------|------------------------|------------------------------------------------|-----------------------------------------------------|---------------------------------------|---------------------------------------|
|            | Brazil[5] | 2014 | 1 | All injuries                                 | Injury patients admitted for more than 24 hours in ER or ICU at a regional reference hospital          | >12  | 163  | 10.4% | 15.5%                  | 0.777                                          | (0.705-0.838)                                       | NA                                    | NA                                    |
|            | China[6]  | 2014 | 1 | All injuries                                 | Emergency ICU patients arrived within 24 h of injury, with ISS >16 in a university hospital            | >18  | 81   | 30.9% | NR                     | Day 1: 0.926;<br>day 3: 0.967;<br>day 7: 0.936 | NA                                                  | NA                                    | NA                                    |
| APACHE III | Iran[7]   | 2016 | 2 | Multiple injuries from road traffic injuries | Injury patients admitted to ICU and survived for at least 4 hours upon arrival in ICU in two hospitals | >14  | 152  | 31.6% | NR                     | 0.797                                          | (0.652-0.901)                                       | NA                                    | NA                                    |
| EISS       | China[8]  | 2014 | 2 | Moderate and severe injuries                 | Injury patients admitted to two tertiary hospitals                                                     | >=15 | 8040 | 6.2%  | Excluded from analysis | Zhejiang: 0.949;<br>Liaoning: 0.942            | Zhejiang: (0.937-0.961);<br>Liaoning: (0.930-0.955) | Zhejiang: : 13.52;<br>Liaoning: 15.55 | Zhejiang: 0.0604;<br>Liaoning: 0.0164 |

|     |               |      |   |                                                    |                                                                                                                       |      |      |       |                        |       |               |    |    |
|-----|---------------|------|---|----------------------------------------------------|-----------------------------------------------------------------------------------------------------------------------|------|------|-------|------------------------|-------|---------------|----|----|
| GAP | India[9]      | 2015 | 1 | life- or limb-threatening injuries                 | Severely injured presented at the urban Level I trauma center                                                         | All  | 1117 | 32%   | 27%                    | 0.85  | (0.80-0.90)   | NA | NA |
|     | Turkey[10]    | 2006 | 1 | Falls                                              | Injury pediatric patients due to specified mechanism admitted to ER in a university hospital                          | <14  | 749  | 3.6%  | 1.74%                  | 0.975 | (0.961-0.985) | NA | NA |
| GCS | Indonesia[11] | 2009 | 1 | Traumatic brain injury with severe or multi-trauma | Injury patients of specified mechanism with severe or multi-trauma to the university hospital (level 2 trauma center) | >=12 | 48   | 37.0% | Excluded from analysis | 0.756 | NA            | NA | NA |

|              |      |   |                                                      |                                                                                 |      |                                          |       |       |                                                          |                                                                                  |    |    |
|--------------|------|---|------------------------------------------------------|---------------------------------------------------------------------------------|------|------------------------------------------|-------|-------|----------------------------------------------------------|----------------------------------------------------------------------------------|----|----|
| Brazil[12]   | 2011 | 1 | Blunt traumatic brain injury                         | Injury patients of specified mechanism hospitalized at a trauma referral center | >14  | 277                                      | 19.1% | NR    | First care: 0.747; best score: 0.791; worst score: 0.782 | First care: (0.675-0.819); best score: (0.735-0.848); worst score: (0.724-0.839) | NA | NA |
| Iran[3]      | 2012 | 1 | Head injuries                                        | Head injury associated with systemic trauma admitted to neurosurgical ICU       | >=14 | 93                                       | 19.5% | NR    | 0.621                                                    | NA                                                                               | NA | NA |
| Morocco[4]   | 2014 | 1 | Moderate and severe traumatic brain injuries         | Injury patients admitted to medical and surgical ICU due to TBI                 | >=16 | 225                                      | 40.0% | 7.6%  | 0.862                                                    | (0.823-0.893)                                                                    | NA | NA |
| Cameroon[13] | 2014 | 1 | All injuries (separate analysis for severe injuries) | Injury patients admitted to ER at the teaching and referral hospital            | All  | All injuries: 2855; severe injuries: 244 | 0.6%  | 13.4% | All injuries: 0.7525; severe injuries: 0.9658            | All injuries: (0.6184-0.8866); severe injuries: (0.9301-1.000)                   | NA | NA |

|     |             |      |   |                |                                                                                              |      |      |       |       |       |               |       |                           |
|-----|-------------|------|---|----------------|----------------------------------------------------------------------------------------------|------|------|-------|-------|-------|---------------|-------|---------------------------|
|     | Turkey[10]  | 2006 | 1 | Falls          | Injury pediatric patients due to specified mechanism admitted to ER in a university hospital | <14  | 749  | 3.6%  | 1.74% | 0.962 | (0.945-0.974) | NA    | 0.37                      |
|     | Iran[14]    | 2007 | 3 | All injuries   | Injury patients admitted to the hospitals                                                    | All  | 4096 | 6%    | NR    | >0.93 | NA            | NA    | NA                        |
| ISS | Lebanon[15] | 2008 | 1 | All injuries   | Injury patients admitted in a major tertiary care referral hospital                          | All  | 891  | 3.6%  | NR    | 0.881 | (0.816-0.945) | 2.97  | 0.70                      |
|     | China[16]   | 2008 | 1 | All injuries   | Patients with multiple injuries admitted to Emergency ICU in a university hospital           | >=16 | 2110 | NR    | NR    | 0.943 | (0.922-0.949) | 6.25  | Compared with NISS: 0.052 |
|     | Turkey[17]  | 2009 | 1 | Firearm injury | Firearm Injury patients admitted to ER in a level-1 trauma center                            | All  | 135  | 12.6% | NR    | 0.964 | NA            | 1.908 | 0.965                     |

|              |      |   |                                                      |                                                                                                |      |                                          |       |       |                                               |                                                                |    |       |
|--------------|------|---|------------------------------------------------------|------------------------------------------------------------------------------------------------|------|------------------------------------------|-------|-------|-----------------------------------------------|----------------------------------------------------------------|----|-------|
| Brazil[18]   | 2009 | 1 | All injuries                                         | Injury patients hospitalized at ICU for >24 hours and within 48 hours in a university hospital | >=18 | 185                                      | 21.1% | NR    | 0.63                                          | (0.52-0.72)                                                    | NA | 0.636 |
| Turkey[1]    | 2011 | 1 | All injuries                                         | Injury patients admitted to ICU in a tertiary referral hospital                                | >=15 | 100                                      | 14%   | NR    | 0.878                                         | NA                                                             | NA | NA    |
| China[6]     | 2014 | 1 | All injuries                                         | Emergency ICU patients arrived within 24 h of injury, with ISS >16 in a university hospital    | >18  | 81                                       | 30.9% | NR    | 0.804                                         | NA                                                             | NA | NA    |
| Cameroon[13] | 2014 | 1 | All injuries (separate analysis for severe injuries) | Injury patients admitted to ER at the teaching and referral hospital                           | All  | All injuries: 2855; severe injuries: 244 | 0.6%  | 13.4% | All injuries: 0.7183; severe injuries: 0.7521 | All injuries: (0.5491-0.8885); Severe injuries: (0.4925-1.000) | NA | NA    |

|              |      |   |                                                      |                                                                                |                        |                                          |       |                        |                                                  |                                                                |    |    |
|--------------|------|---|------------------------------------------------------|--------------------------------------------------------------------------------|------------------------|------------------------------------------|-------|------------------------|--------------------------------------------------|----------------------------------------------------------------|----|----|
| Pakistan[19] | 2015 | 1 | Abdominal gunshot injury                             | Injury patients admitted to a university hospital with the specified mechanism | >=16                   | 70                                       | 15.7% | Excluded from analysis | 0.952                                            | (0.902-1.000)                                                  | NA | NA |
| India[9]     | 2015 | 1 | life- or limb-threatening injuries                   | Severely injured presented at the urban Level I trauma center                  | All                    | 1117                                     | 32%   | 27%                    | 0.69                                             | (0.62-0.76)                                                    | NA | NA |
| Cameroon[13] | 2014 | 1 | All injuries (separate analysis for severe injuries) | Injury patients admitted to ER at the teaching and referral hospital           | All                    | All injuries: 2855; severe injuries: 244 | 0.6%  | 13.4%                  | All injuries: 0.7784; severe injuries: 0.9820    | All injuries: (0.6285-0.9212), severe injuries: (0.9585-1.000) | NA | NA |
| India[9]     | 2015 | 1 | life- or limb-threatening injuries                   | Severely injured presented at the urban Level I trauma center                  | All                    | 1117                                     | 32%   | 27%                    | 0.86                                             | (0.81-0.91)                                                    | NA | NA |
| Malawi[20]   | 2015 | 1 | All injuries                                         | Injury patients treated in a tertiary care referral hospital                   | Adults (not specified) | All: 15617; admitted: 2811               | 5%    | Excluded from analysis | All patients: 0.6904; admitted patients: 0.5929; | NA                                                             | NA | NA |

|      |            |      |   |                                    |                                                                                                |      |                                          |       |     |                                                     |                                                                             |                                                    |                                                   |
|------|------------|------|---|------------------------------------|------------------------------------------------------------------------------------------------|------|------------------------------------------|-------|-----|-----------------------------------------------------|-----------------------------------------------------------------------------|----------------------------------------------------|---------------------------------------------------|
| MGAP | India[9]   | 2015 | 1 | life- or limb-threatening injuries | Severely injured presented at the urban Level I trauma center                                  | All  | 1117                                     | 32%   | 27% | 0.84                                                | (0.79-0.89)                                                                 | NA                                                 | NA                                                |
| LISS | China[21]  | 2012 | 3 | Major injuries                     | Patients with major injury (AIS>3 in a single body region) admitted in tertiary hospitals      | >=15 | 12238 (3,784, 4,436, and 4,018 patients) | 5.9%  | NR  | Hangzhou : 0.949; Zhejiang: 0.935; Shenyang : 0.936 | Hangzhou : (0.938-0.959); Zhejiang: (0.921-0.953); Shenyang : (0.921-0.953) | Hangzhou: 13.79; Zhejiang : 18.43; Shenyang: 17.45 | Hangzhou: 0.055; Zhejiang: 0.005; Shenyang: 0.008 |
| LODS | Brazil[18] | 2009 | 1 | All injuries                       | Injury patients hospitalized at ICU for >24 hours and within 48 hours in a university hospital | >=18 | 185                                      | 21.1% | NR  | 0.83                                                | (0.72-0.89)                                                                 | NA                                                 | 0.0596                                            |
| NISS | China[16]  | 2008 | 1 | All injuries                       | Patients with multiple injuries admitted to Emergency ICU in a university hospital             | >=16 | 2110                                     | NR    | NR  | 0.938                                               | (0.922-0.949)                                                               | 7.36                                               | Compared with ISS: 0.052                          |



|            |      |   |                                                                                      |                                                                                                |      |                                          |       |    |                                                     |                                                                             |                                                    |                                                    |
|------------|------|---|--------------------------------------------------------------------------------------|------------------------------------------------------------------------------------------------|------|------------------------------------------|-------|----|-----------------------------------------------------|-----------------------------------------------------------------------------|----------------------------------------------------|----------------------------------------------------|
| Turkey[17] | 2009 | 1 | Firearm injury                                                                       | Firearm Injury patients admitted to ER in a level-1 trauma center university hospital          | All  | 135                                      | 12.6% | NR | 0.98                                                | NA                                                                          | 1.4                                                | 0.994                                              |
| Brazil[18] | 2009 | 1 | All injuries                                                                         | Injury patients hospitalized at ICU for >24 hours and within 48 hours in a university hospital | >=18 | 185                                      | 21.1% | NR | 0.58                                                | (0.47-0.67)                                                                 | NA                                                 | 0.1683                                             |
| China[21]  | 2012 | 3 | Major injuries                                                                       | Patients with major injury (AIS>3 in a single body region) admitted in tertiary hospitals      | >=15 | 12238 (3,784, 4,436, and 4,018 patients) | 5.9%  | NR | Hangzhou : 0.931; Zhejiang: 0.911; Shenyang : 0.918 | Hangzhou : (0.918-0.944); Zhejiang: (0.890-0.931); Shenyang : (0.904-0.932) | Hangzhou: 15.76; Zhejiang : 22.70; Shenyang: 28.97 | Hangzhou: 0.027; Zhejiang: 0.001; Shenyang: <0.001 |
| China[22]  | 2015 | 2 | Serious injury (exclude isolated minor or moderate injuries to a single body region) | Injury patients except those with minor injury, admitted to two level-3 first-class hospitals  | >18  | 8079                                     | 6%    | NR | Hangzhou : 0.929; Shenyang : 0.924                  | Hangzhou : (0.916-0.943); Shenyang : (0.910-0.938)                          | Hangzhou: 29.71; Shenyang: 33.49                   | Hangzhou: <0.001; Shenyang: <0.001                 |

|      |              |      |   |                                                      |                                                                                               |     |                                          |       |       |                                               |                                                                |    |    |
|------|--------------|------|---|------------------------------------------------------|-----------------------------------------------------------------------------------------------|-----|------------------------------------------|-------|-------|-----------------------------------------------|----------------------------------------------------------------|----|----|
| RAPS | Brazil[5]    | 2014 | 1 | All injuries                                         | Injury patients admitted for > 24 hours in ER or ICU at regional reference hospital           | >12 | 163                                      | 10.4% | 15.5% | 0.806                                         | (0.737-0.864)                                                  | NA | NA |
| REMS | Brazil[5]    | 2014 | 1 | All injuries                                         | Injury patients admitted for more than 24 hours in ER or ICU at a regional reference hospital | >12 | 163                                      | 10.4% | 15.5% | 0.761                                         | (0.688-0.824)                                                  | NA | NA |
| RTS  | Cameroon[13] | 2014 | 1 | All injuries (separate analysis for severe injuries) | Injury patients admitted to ER at the teaching and referral hospital                          | All | All injuries: 2855; severe injuries: 244 | 0.6%  | 13.4% | All injuries: 0.7341; severe injuries: 0.9674 | All injuries: (0.5896-0.8786); severe injuries: (0.9330-1.000) | NA | NA |
|      | India[9]     | 2015 | 1 | life- or limb-threatening injuries                   | Severely injured presented at the urban Level I trauma center                                 | All | 1117                                     | 32%   | 27%   | 0.85                                          | (0.80-0.90)                                                    | NA | NA |

|             |            |      |   |                                              |                                                                                               |                            |                            |       |                        |                                                 |               |    |       |
|-------------|------------|------|---|----------------------------------------------|-----------------------------------------------------------------------------------------------|----------------------------|----------------------------|-------|------------------------|-------------------------------------------------|---------------|----|-------|
|             | Malawi[20] | 2015 | 1 | All injuries                                 | Injury patients treated in a tertiary care referral hospital                                  | Adults (age not specified) | All: 15617; admitted: 2811 | 5%    | Excluded from analysis | All patients: 0.6703; admitted patients: 0.6371 | NA            | NA | NA    |
| SAPS II     | Brazil[18] | 2009 | 1 | All injuries                                 | Injury patients hospitalized at ICU >24 hours and <48 hours in a university hospital          | >=18                       | 185                        | 21.1% | NR                     | 0.85                                            | (0.76-0.91)   | NA | 0.887 |
|             | Morocco[4] | 2014 | 1 | Moderate and severe traumatic brain injuries | Injury patients admitted to medical and surgical ICU due to TBI                               | >=16                       | 225                        | 40.0% | 7.6%                   | 0.843                                           | (0.795-0.898) | NA | NA    |
| s-APACHE II | Brazil[5]  | 2014 | 1 | All injuries                                 | Injury patients admitted for more than 24 hours in ER or ICU at a regional reference hospital | >12                        | 163                        | 10.4% | 15.5%                  | 0.788                                           | (0.717-0.848) | NA | NA    |

|       |               |      |   |                                                                                      |                                                                                                                       |      |      |       |                        |                                    |                                                    |                                  |                                  |
|-------|---------------|------|---|--------------------------------------------------------------------------------------|-----------------------------------------------------------------------------------------------------------------------|------|------|-------|------------------------|------------------------------------|----------------------------------------------------|----------------------------------|----------------------------------|
| TISS  | China[22]     | 2015 | 2 | Serious injury (exclude isolated minor or moderate injuries to a single body region) | Injury patients except those with minor injury, admitted to two level-3 first-class hospitals                         | >18  | 8079 | 6%    | NR                     | Hangzhou : 0.949; Shenyang : 0.942 | Hangzhou : (0.939-0.959); Shenyang : (0.931-0.954) | Hangzhou: 19.59; Shenyang: 21.19 | Hangzhou: 0.003; Shenyang: 0.002 |
|       | Indonesia[11] | 2009 | 1 | Traumatic brain injury with severe or multi-trauma                                   | Injury patients of specified mechanism with severe or multi-trauma to the university hospital (level 2 trauma center) | >=12 | 48   | 37.0% | Excluded from analysis | 0.796                              | NA                                                 | NA                               | NA                               |
| TRISS | Trinidad[23]  | 2009 | 3 | All injuries                                                                         | Injury patients admitted in the three tertiary care teaching hospitals                                                | All  | 326  | 4.30% | NR                     | 0.82                               | (0.69-0.96)                                        | NA                               | NA                               |
|       | Turkey[1]     | 2011 | 1 | All injuries                                                                         | Injury patients admitted to ICU in a tertiary referral hospital                                                       | >=15 | 100  | 14%   | NR                     | 0.926                              | NA                                                 | NA                               | NA                               |

|              |      |   |                |                                                                                                        |                       |      |       |                        |                                                                  |    |                                          |        |
|--------------|------|---|----------------|--------------------------------------------------------------------------------------------------------|-----------------------|------|-------|------------------------|------------------------------------------------------------------|----|------------------------------------------|--------|
| Brazil[24]   | 2011 | 1 | All injuries   | Injury patients admitted to ER at the level I trauma center                                            | >=18                  | 533  | 24.1% | 2.8%                   | TRISS: 0.9; NTRISS: 0.92                                         | NA | 0.0000 for the TRISS; 0.0002 for NTRISS. | 0.0012 |
| Thailand[25] | 2012 | 1 | Blunt injuries | Injury patients registered in the Regional Hospital                                                    | All                   | 6411 | 4.1%  | Excluded from analysis | Modified version 1: 0.9619, version 2: 0.9601, version 3: 0.9115 | NA | NA                                       | NA     |
| Thailand[2]  | 2012 | 1 | All injuries   | Injury patients admitted to surgical ICU, neurosurgical ICU or burn unit in tertiary referral hospital | Adult (not specified) | 132  | 20%   | NR                     | 0.83                                                             | NA | NA                                       | NA     |
| China[6]     | 2014 | 1 | All injuries   | Emergency ICU patients arrived within 24 h of injury, with ISS >16 in a university hospital            | >18                   | 81   | 30.9% | NR                     | 0.974                                                            | NA | NA                                       | NA     |

|              |      |   |                                                      |                                                                                                        |     |                                          |       |       |                                               |                                                                |      |      |
|--------------|------|---|------------------------------------------------------|--------------------------------------------------------------------------------------------------------|-----|------------------------------------------|-------|-------|-----------------------------------------------|----------------------------------------------------------------|------|------|
| Cameroon[13] | 2014 | 1 | All injuries (separate analysis for severe injuries) | Injury patients admitted to ER at the teaching and referral hospital                                   | All | All injuries: 2855; severe injuries: 244 | 0.6%  | 13.4% | All injuries: 0.7117; severe injuries: 0.9386 | All injuries: (0.5346-0.8888); severe injuries: (0.8566-1.000) | 6.17 | 0.62 |
| Iran[7]      | 2016 | 2 | Multiple injuries from road traffic injuries         | Injury patients admitted to ICU and survived for at least 4 hours upon arrival in ICU in two hospitals | >14 | 152                                      | 31.6% | NR    | 0.806                                         | (0.663-0.908)                                                  | NA   | NA   |

\*Not reported; ‡Not applicable

## References

- 1 Köseoğlu Z, Kuvvetli A, Kösenli O, et al. Increased nutritional risk in major trauma: correlation with complications and prolonged length of stay. *Ulus Travma Acil Cerrahi Derg* 2011;17:521-4 doi:10.5505/tjtes.2011.28582.
- 2 Thanapaisal C, Saksaen P. A comparison of the Acute Physiology and Chronic Health Evaluation (APACHE) II score and the Trauma-Injury Severity Score (TRISS) for outcome assessment in Srinagarind Intensive Care Unit trauma patients. *J Med Assoc Thai* 2012;95 Suppl 11:25.
- 3 Zali AR, Seddighi AS, Seddighi A, et al. Comparison of the acute physiology and chronic health evaluation score (APACHE) II with GCS in predicting hospital mortality of neurosurgical intensive care unit patients. *Glob J Health Sci* 2012;4:179-84 doi:10.5539/gjhs.v4n3p179 [doi].
- 4 Nejmi H, Rebahi H, Ejlaidi A, et al. The ability of two scoring systems to predict in-hospital mortality of patients with moderate and severe traumatic brain injuries in a Moroccan intensive care unit. *Indian J Crit Care Med* 2014;18:369-75 doi:10.4103/0972-5229.133895 [doi].
- 5 Polita JR, Gomez J, Friedman G, et al. Comparison of APACHE II and three abbreviated APACHE II scores for predicting outcome among emergency trauma patients. *Rev Assoc Med Bras (1992)* 2014;60:381-6 doi:S0104-42302014000400381 [pii].
- 6 Ba L, Wu DQ, Qian AY, et al. Dynamic changes of serum cholinesterase activity after severe trauma. *J Zhejiang Univ Sci B* 2014;15:1023-31 doi:10.1631/jzus.B1400129 [doi].
- 7 Darbandsar Mazandarani P, Heydari K, Hatamabadi H, et al. Acute Physiology and Chronic Health Evaluation (APACHE) III Score compared to Trauma-Injury Severity Score (TRISS) in Predicting Mortality of Trauma Patients. *Emerg (Tehran)* 2016;4:88-91.
- 8 Wang MD, Fan WH, Qiu WS, et al. The exponential function transforms the Abbreviated Injury Scale, which both improves accuracy and simplifies scoring. *Eur J Trauma Emerg Surg* 2014;40:287-94 doi:10.1007/s00068-013-0331-1 [doi].
- 9 Laytin AD, Kumar V, Juillard CJ, et al. Choice of injury scoring system in low- and middle-income countries: Lessons from Mumbai. *Injury* 2015;46:2491-7 doi:10.1016/j.injury.2015.06.029 [doi].
- 10 Bulut M, Koksall O, Korkmaz A, et al. Childhood falls: characteristics, outcome, and comparison of the Injury Severity Score and New Injury Severity Score. *Emergency Medicine Journal : EMJ* 2006;23:540-5 doi:10.1136/emj.2005.029439.
- 11 Joosse P, Smit G, Arendshorst RJ, et al. Outcome and prognostic factors of traumatic brain injury: a prospective evaluation in a Jakarta University hospital. *J Clin Neurosci* 2009;16:925-8 doi:10.1016/j.jocn.2008.06.014 [doi].
- 12 Settevall CH, de Sousa RM, Furbringer e Silva, S C. In-hospital mortality and the Glasgow Coma Scale in the first 72 hours after traumatic brain injury. *Rev Lat Am Enfermagem* 2011;19:1337-43 doi:S0104-11692011000600009 [pii].

- 13 Weeks SR, Juillard CJ, Monono ME, et al. Is the Kampala trauma score an effective predictor of mortality in low-resource settings? A comparison of multiple trauma severity scores. *World J Surg* 2014;38:1905-11 doi:10.1007/s00268-014-2496-0 [doi].
- 14 Rabbani A, Moini M. Application of "Trauma and Injury Severity Score" and "A Severity Characterization of Trauma" score to trauma patients in a setting different from "Major Trauma Outcome Study". *Arch Iran Med* 2007;10:383-6 doi:0019 [pii].
- 15 Tamim H, Al Hazzouri AZ, Mahfoud Z, et al. The injury severity score or the new injury severity score for predicting mortality, intensive care unit admission and length of hospital stay: experience from a university hospital in a developing country. *Injury* 2008;39:115-20 doi:S0020-1383(07)00239-2 [pii].
- 16 Zhao XG, Ma YF, Zhang M, et al. Comparison of the new injury severity score and the injury severity score in multiple trauma patients. *Chin J Traumatol* 2008;11:368-71 doi:S1008-1275(08)60074-7 [pii].
- 17 Köksal Ö, Özdemir F, Bulut M, et al. Comparison of trauma scoring systems for predicting mortality in firearm injuries. *Ulus Travma Acil Cerrahi Derg* 2009;15:559-64.
- 18 Nogueira LdS, Sousa, Regina Marcia Cardoso de, Domingues CdA. Severity of trauma victims admitted in intensive care units: comparative study among different indexes. *Rev Lat Am* 2009;17:1037-42.
- 19 Shah AA, Rehman A, Shah SJ, et al. Abdominal gunshot wounds—a comparative assessment of severity measures. *J Surg Res*;198:334-9 doi:10.1016/j.jss.2015.03.061.
- 20 Haac B, Varela C, Geyer A, et al. The utility of the Kampala trauma score as a triage tool in a sub-Saharan African trauma cohort. *World J Surg* 2015;39:356-62 doi:10.1007/s00268-014-2830-6 [doi].
- 21 Wang X, Gu X, Zhang Z, et al. The natural logarithm transforms the abbreviated injury scale and improves accuracy scoring. *Ulus Travma Acil Cerrahi Derg* 2012;18:483-9 doi:10.5505/tjtes.2012.08522 [doi].
- 22 Wang M, Qiu W, Qiu F, et al. Tangent function transformation of the Abbreviated Injury Scale improves accuracy and simplifies scoring. *Arch Med Sci* 2015;11:130-6 doi:10.5114/aoms.2015.49209 [doi].
- 23 Hariharan S, Chen D, Parker K, et al. Evaluation of trauma care applying TRISS methodology in a Caribbean developing country. *J Emerg Med* 2009;37:85-90 doi:10.1016/j.jemermed.2007.09.051 [doi].
- 24 Domingues CdA, Sousa, Regina Marcia Cardoso de, Nogueira LdS, et al. The role of the New Trauma and Injury Severity Score (NTRISS) for survival prediction. *Revista da Escola de Enfermagem da USP* 2011;45:1353-8.
- 25 Kimura A, Chadbunchachai W, Nakahara S. Modification of the Trauma and Injury Severity Score (TRISS) method provides better survival prediction in Asian blunt trauma victims. *World J Surg* 2012;36:813-8 doi:10.1007/s00268-012-1498-z [doi].
